# Supplementary material for: H2S-activatable near-infrared afterglow luminescent probes for sensitive molecular imaging in vivo
Source: PubMed Central journal article supplement (PMC6978336; doi:10.1038/s41467-020-14307-y), 2020-01-23
Supplement: 41467_2020_14307_MOESM2_ESM.pdf [file 41467_2020_14307_MOESM2_ESM.pdf]

## Description of Additional Supplementary Files

**File name:** Supplementary Dataset 1

**Description:** Summary of reported optical imaging probes for H<sub>2</sub>S detection *in vivo*.
