# Supplementary material for: H2S-activatable near-infrared afterglow luminescent probes for sensitive molecular imaging in vivo
Source: PubMed Central journal article supplement (PMC6978336; doi:10.1038/s41467-020-14307-y), 2020-01-23
Supplement: 41467_2020_14307_MOESM3_ESM.pdf [file 41467_2020_14307_MOESM3_ESM.pdf]

**Supplementary Dataset 1.** Summary of reported optical imaging probes for H<sub>2</sub>S detection in vivo.

| Probe <sup>a</sup>   | Emission [nm]        | Turn-on ratio (fold) | LOD <sup>b</sup>   | Reaction Kinetics <sup>c</sup>                                                                                | Detection of H <sub>2</sub> S in mice <sup>d</sup> |                                  |            | Refs. |
|----------------------|----------------------|----------------------|--------------------|---------------------------------------------------------------------------------------------------------------|----------------------------------------------------|----------------------------------|------------|-------|
|                      |                      |                      |                    |                                                                                                               | Model                                              | Administration method            | Endogenous |       |
| NIR-II@Si            | 900                  | N.D. <sup>f</sup>    | 37 nM              | 5 min (10 equiv. of H <sub>2</sub> S in PBS)                                                                  | Mouse tumor                                        | Intratumoral injection (i.t.)    | Yes        | 1     |
| NIR-H <sub>2</sub> S | 830                  | 58                   | 270 nM             | 60 min (100 equiv. H <sub>2</sub> S in PBS)                                                                   | Mouse tumor                                        | i.t.                             | Yes        | 2     |
| BSOHS@Si300          | 717/534 <sup>e</sup> | 15                   | 53 nM              | 3 min (10 equiv. H <sub>2</sub> S in PBS)                                                                     | Mouse tumor                                        | i.t.                             | Yes        | 3     |
| Probe 1              | 796                  | 87                   | 39.6 nM            | 25 min (60 equiv. H <sub>2</sub> S in PBS containing 10% DMSO);<br>$k_2 = 14.9 \text{ M}^{-1} \text{ s}^{-1}$ | Mouse tumor                                        | i.t.                             | Yes        | 4     |
| NIR-Az               | 720                  | 200                  | 0.26 $\mu\text{M}$ | 30 min (20 equiv. H <sub>2</sub> S in PBS);                                                                   | Mouse intraperitoneal cavity                       | Intraperitoneal injection (i.p.) | No         | 5     |
| NIR-HS               | 723                  | 50                   | 38 nM              | 30 min (10 equiv. H <sub>2</sub> S in PBS containing 5% CH <sub>3</sub> CN)                                   | Mouse intraperitoneal cavity                       | i.p.                             | No         | 6     |
| Probe 1              | 670                  | 65                   | 3.05 $\mu\text{M}$ | 10 min (50 equiv. H <sub>2</sub> S in PBS containing 50% DMSO)                                                | Mouse back                                         | Skin-popping injection (s.p.)    | No         | 7     |
| Azidoluciferin       | Bioluminescence      | 8                    | 0.1 $\mu\text{M}$  | 60 min (10 equiv. H <sub>2</sub> S in PBS)                                                                    | Mouse tumor                                        | Intravenous injection (i.v.)     | Yes        | 8     |
| Probe 1              | Bioluminescence      | 8                    | N.D. <sup>f</sup>  | 20 min (250 equiv. H <sub>2</sub> S in Tris-HCl buffer)                                                       | Mouse body                                         | i.p.                             | No         | 9     |
| NanoPT               | 950                  | N.D. <sup>f</sup>    | 106 nM             | 20 min (5 equiv. H <sub>2</sub> S in PBS)                                                                     | Mouse tumor                                        | i.t.                             | Yes        | 10    |
| Probe 1              | 542                  | N.D. <sup>f</sup>    | 1 $\mu\text{M}$    | 15 min (7 equiv. H <sub>2</sub> S in PBS containing 1% acetone)                                               | Mouse intraperitoneal cavity                       | N.D. <sup>f</sup>                | Yes        | 11    |
| Mito-HS              | 540                  | 21                   | N.D. <sup>f</sup>  | 60 min (25 equiv. H <sub>2</sub> S in PBS with 1% DMSO)                                                       | Mouse tumor                                        | s.p.                             | Yes        | 12    |
| Ru-MDB               | 612                  | 86                   | 45 nM              | 50 min (10 equiv. H <sub>2</sub> S in PBS)                                                                    | Mouse legs                                         | s.p.                             | Yes        | 13    |
| 1-H <sub>2</sub> S   | 635                  | 7                    | 47 $\mu\text{M}$   | 15 min (50 equiv. H <sub>2</sub> S in PBS with 20% DMSO)                                                      | Mouse intraperitoneal cavity                       | i.p.                             | No         | 14    |

|                            |                   |                   |                    |                                                                                                       |                              |                   |     |           |
|----------------------------|-------------------|-------------------|--------------------|-------------------------------------------------------------------------------------------------------|------------------------------|-------------------|-----|-----------|
| CHC1-UCNPs                 | 541               | 16.2              | 0.13 $\mu\text{M}$ | 120 s (0.05 mg/mL probe with 60 $\mu\text{M}$ H <sub>2</sub> S in HEPES buffer)                       | Resected mouse livers        | i.v.              | Yes | 15        |
| CHS-3                      | Chemiluminescence | 12                | N.D. <sup>f</sup>  | 10 min (5 equiv. H <sub>2</sub> S in PBS containing 20% Emerald II Enhancer)                          | Mouse intraperitoneal cavity | i.p.              | No  | 16        |
| Probe 1                    | 500               | N.D. <sup>f</sup> | 0.52 $\mu\text{M}$ | 3 min (150 equiv. H <sub>2</sub> S in PBS containing 50% DMSO)                                        | Mouse intraperitoneal cavity | i.p.              | No  | 17        |
| TMSDNPOB                   | 592               | 30                | 1.27 $\mu\text{M}$ | 20 min (10 equiv. H <sub>2</sub> S in HEPES buffer containing 50% DMSO)                               | Mice liver slices            | N.D. <sup>f</sup> | Yes | 18        |
| Cy-PBA                     | 725               | N.D. <sup>f</sup> | 21 nM              | 2 min (2 equiv. H <sub>2</sub> S in PBS buffer containing 50% DMSO)                                   | intraperitoneal cavity       | i.p.              | No  | 19        |
| I <sup>2+</sup> -SNP830-FA | 830               | 15                | 0.70 $\mu\text{M}$ | 10 min (6.25 equiv. H <sub>2</sub> S in PBS buffer); $k_2 = \sim 91.6 \text{ M}^{-1} \text{ s}^{-1}$  | Mouse liver<br>Mouse tumor   | i.v.              | Yes | 20        |
| <b>F1<sup>2+</sup>-ANP</b> | Afterglow         | 122               | 0.1 $\mu\text{M}$  | 1 min (3.5 equiv. H <sub>2</sub> S in PBS buffer); $k_2 = 1563 \pm 141 \text{ M}^{-1} \text{ s}^{-1}$ | Mouse tumor                  | i.v.              | Yes | This work |

<sup>a</sup> The name of each probe is the one shown in each ref. <sup>b</sup> LOD: limitation of detection. <sup>c</sup> Second-order reaction rate. If there is no value reported, we just list the time to achieve the maximum activation. We also list the buffer for the reaction. <sup>d</sup> The probe was used to detect H<sub>2</sub>S in mice. <sup>e</sup> Ratiometric fluorescent probe. <sup>f</sup> N.D.: Not Determined.

## Supplementary References

1. Xu, G. et al. Imaging of colorectal cancers using activatable nanoprobe with second near-infrared window emission. *Angew. Chem. Int. Ed.* **57**, 3626-3630 (2018).
2. Xiong, J., Xia, L., Huang, Q., Huang, J., Gu, Y. & Wang, P. Cyanine-based NIR fluorescent probe for monitoring H<sub>2</sub>S and imaging in living cells and in vivo. *Talanta* **184**, 109-114 (2018).
3. Wang, F. et al. Realizing highly chemoselective detection of H<sub>2</sub>S in vitro and in vivo with fluorescent probes inside core-shell silica nanoparticles. *Biomaterials* **159**, 82-90 (2018).
4. Zhang, K. et al. A new H<sub>2</sub>S-specific near-infrared fluorescence-enhanced probe that can visualize the H<sub>2</sub>S level in colorectal cancer cells in mice. *Chem. Sci.* **8**, 2776-2781 (2017).
5. Park, C. S. et al. A near-infrared "turn-on" fluorescent probe with a self-immolative linker for the in vivo quantitative detection and imaging of hydrogen sulfide. *Biosens. Bioelectron.* **89**, 919-926 (2017).

6. Zhang, L. et al. A highly selective and sensitive near-infrared fluorescent probe for imaging of hydrogen sulphide in living cells and mice. *Sci. Rep.* **6**, 18868 (2016).
7. Sun, W. et al. A two-photon fluorescent probe with near-infrared emission for hydrogen sulfide imaging in biosystems. *Chem. Commun.* **49**, 3890-3892 (2013).
8. Tian, X., Li, Z., Lau, C. & Lu, J. Visualization of in vivo hydrogen sulfide production by a bioluminescence probe in cancer cells and nude mice. *Anal. Chem.* **87**, 11325-11331 (2015).
9. Ke, B. et al. Bioluminescence probe for detecting hydrogen sulfide in vivo. *Anal. Chem.* **88**, 592-595 (2016).
10. Shi, B. et al. Hydrogen sulfide-activatable second near-infrared fluorescent nanoassemblies for targeted photothermal cancer therapy. *Nano. Lett.* **18**, 6411-6416 (2018).
11. Jin, X. et al. Novel fluorescein-based fluorescent probe for detecting H<sub>2</sub>S and its real applications in blood plasma and biological imaging. *Anal. Chem.* **88**, 11253-11260 (2016).
12. Wu, Z., Liang, D. & Tang, X. Visualizing hydrogen sulfide in mitochondria and lysosome of living cells and in tumors of living mice with positively charged fluorescent chemosensors. *Anal. Chem.* **88**, 9213-9218 (2016).
13. Du, Z. et al. Quantitative monitoring and visualization of hydrogen sulfide in vivo using a luminescent probe based on a ruthenium(II) complex. *Angew. Chem., Int. Ed.* **57**, 3999-4004 (2018).
14. Liu, K., Liu, C., Shang, H., Ren, M. & Lin, W. A novel red light emissive two-photon fluorescent probe for hydrogen sulfide (H<sub>2</sub>S) in nucleolus region and its application for H<sub>2</sub>S detection in zebrafish and live mice. *Sens. Actuator B-Chem.* **256**, 342-350 (2018).
15. Zhou, Y. et al. Inorganic-organic hybrid nanoprobe for NIR-excited imaging of hydrogen sulfide in cell Cultures and inflammation in a mouse model. *Small* **10**, 4874-4885 (2014).
16. Cao, J. et al. Chemiluminescent probes for imaging H<sub>2</sub>S in living animals. *Chem. Sci.* **6**, 1979-1985 (2015).
17. Xie, X., Yin, C., Yue, Y., Chao, J. & Huo, F. Fluorescent probe detect distinguishly sulfite/hydrogen sulfide and thiol via two emission channels in vivo. *Sens. Actuator B-Chem.* **277**, 647-653 (2018).
18. Ji, Y., Xia, L. J., Chen, L., Guo, X. F., Wang, H. & Zhang, H. J. A novel bodipy-based fluorescent probe for selective detection of hydrogen sulfide in living cells and tissues. *Talanta* **181**, 104-111 (2018).
19. Zhang, X. et al. A highly sensitive near-infrared fluorescent probe for the detection of hydrogen sulfide and its application in living cells and mice. *New J. Chem.* **42**, 19795-19800 (2018).

20. Wu, L. et al. Engineering of Electrochromic Materials as Activatable Probes for Molecular Imaging and Photodynamic Therapy. *J. Am. Chem. Soc.* **140**, 16340-16352 (2018).
